# Supplementary material for: Optimum Preparation Conditions for Highly Individualized Chitin Nanofibers Using Ultrasonic Generator
Source: MDPI journal article supplement (doi:10.3390/polym13152501), 2021-07-29
Supplement: s1 [file s1]

# Optimum Preparation Conditions for Highly Individualized Chitin Nanofibers Using Ultrasonic Generator

Dagmawi Abebe Zewude <sup>1</sup>, Hironori Izawa, <sup>1,2</sup> and Shinsuke Ifuku <sup>1,2,\*</sup>

<sup>1</sup> Graduate School of Engineering, Tottori University, 4-101 Koyama-Minami, Tottori 680-8550, Japan; d19t3106x@edu.tottori-u.ac.jp (D.A.Z.); h-izawa@tottori-u.ac.jp (H.I.)

<sup>2</sup> Center for Research on Green Sustainable Chemistry, Tottori University, Tottori 680-8550, Japan

\* Correspondence: sifuku@tottori-u.ac.jp

## Supplementary Materials

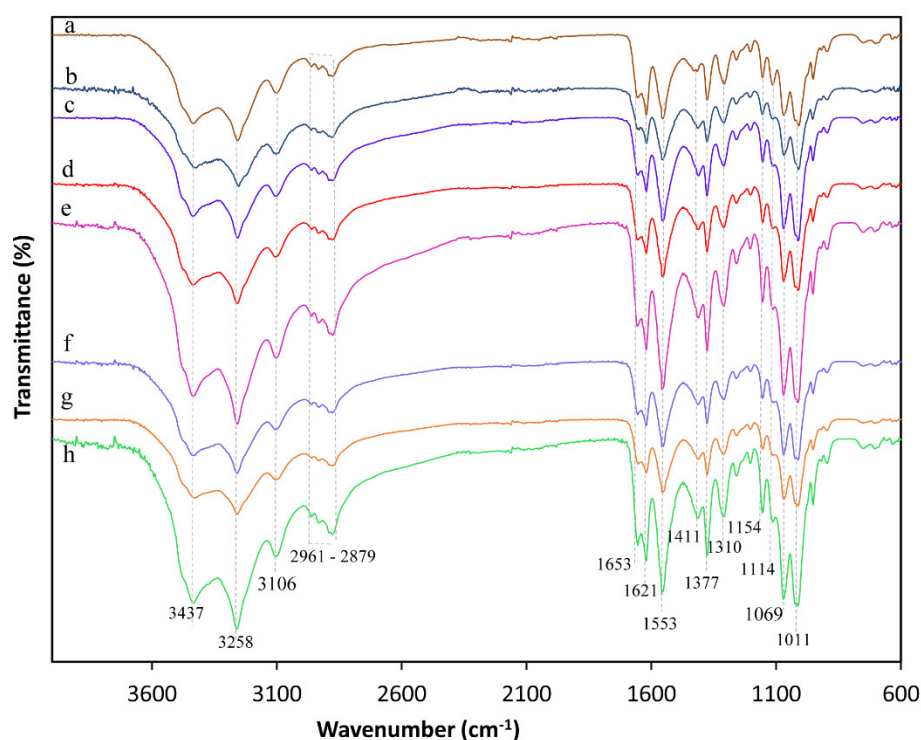

**Figure S1.** FT-IR spectra of pure  $\alpha$ -chitin powder (a), partially deacetylated  $\alpha$ -chitin (b), and ultra-sonicated for 5 (c), 10 (d), 15 (e), 20 (f), 25 (g), and 30 min (h).
